# Supplementary material for: Brown fat organogenesis and maintenance requires AKT1 and AKT2
Source: PubMed Central journal article supplement — Mol Metab. 2019 Feb 20;23:60–74. doi: 10.1016/j.molmet.2019.02.004 (PMC6480051; doi:10.1016/j.molmet.2019.02.004), 2019-02-20
Supplement: mmc1.pdf [file mmc1.pdf]

**Table S1. Mouse primers used in this study.**

| <i>Gene</i>                     | <i>Forward primer (5'-3')</i> | <i>Reverse primer (5'-3')</i> |
|---------------------------------|-------------------------------|-------------------------------|
| <i>Tbp</i>                      | GAAGCTGCGGTACAATTCCAG         | CCCCTTGTACCCTTCACCAAT         |
| <i>Elovl3</i>                   | TCCGCGTTCTCATGTAGGTCT         | GGACCTGATGCAACCCTATGA         |
| <i>Ppar<math>\gamma</math>1</i> | TGAAAGAAGCGGTGAACCACTG        | TGGCATCTCGTGTCAACCATG         |
| <i>Ppar<math>\gamma</math>2</i> | TGGCATCTCTGTGTCAACCATG        | GCATGGTGCCTTCGCTGA            |
| <i>C/ebp<math>\alpha</math></i> | CAAGCCCAGCAACGAGTACCG         | GTCACTGGTCAACTCCAGCAC         |
| <i>C/ebp<math>\beta</math></i>  | TCGGGACTTGATGCAATCC           | AAACATCAACAACCCCGC            |
| <i>C/ebp<math>\delta</math></i> | GCTTTGTGGTTGCTGTTGAA          | ATCGACTTCAGCGCCTACA           |
| <i>Prdm16</i>                   | GACATTCCAATCCCACCAGA          | CACCTCTGTATCCGTCAGCA          |
| <i>ucp1</i>                     | CTGCCAGGACAGTACCCAAG          | TCAGCTGTTCAAAGCACACA          |
| <i>Ppargc1alpha</i>             | CCCTGCCATTGTTAAGACC           | TGCTGCTGTTCCCTGTTTTTC         |
| <i>ADIPONECTIN</i>              | TGTTCCCTCTTAATCCTGCCCA        | CCAACCTGCACAAGTTCCTT          |
| <i>mCPT1</i>                    | GGGCACCTCTGGGAGTTTGT          | TTGGCTCACCCACACAGTGT          |
| <i>aP2</i>                      | GATGCCTTTGTGGGAACCT           | CTGTCGTCTGCGGTGATTT           |
| <i>cox7a</i>                    | GCTGCTGAGGAGGCAAAATGAGG       | CCATTCCCCCGCCTTTCAAG          |
| <i>sgk2</i>                     | GGTGGTGCTTAGGGGCAGTCC         | GAGGTCACAGGCAGCCACTGT         |
| <i>dio2</i>                     | TGCGCTGTGTCTGGAACAG           | CTGGAATTGGGAGCATCTTCA         |
| <i>dpt</i>                      | CTGCCGCTATAGCAAGAGGT          | TGGCTTGGGTA CTCTGTTGTC        |
| <i>cd137</i>                    | CGTGCAGAACTCCTGTGATAAC        | GTCCACCTATGCTGGAGAAGG         |
| <i>retn</i>                     | CTGTCCAGTCTATCCTTGACAC        | CAGAAGGCACAGCAGTCTTGA         |
| <i>Cidea</i>                    | ATCACAACTGGCCTGGTTACG         | TACTACCCGGTGTCCATTTCT         |
