# Supplementary material for: Brown fat organogenesis and maintenance requires AKT1 and AKT2
Source: PubMed Central journal article supplement — Mol Metab. 2019 Feb 20;23:60–74. doi: 10.1016/j.molmet.2019.02.004 (PMC6480051; doi:10.1016/j.molmet.2019.02.004), 2019-02-20
Supplement: mmc2.pdf [file mmc2.pdf]

**Table S2. Antibodies used in this study.**

| <i>Antigen</i>                   | <i>Source</i>                         | <i>Buffers</i>            | <i>Dilution</i>  |
|----------------------------------|---------------------------------------|---------------------------|------------------|
| <b>Western Blot</b>              |                                       |                           |                  |
| <i>Raptor</i>                    | CST (2280)                            | 5% Non-fat milk           | 1:1000           |
| <i>UCP1</i>                      | Abcam (ab10983)                       | 5% Non-fat milk           | 1:1000           |
| <i>AKT1</i>                      | CST (2938)                            | 5% Non-fat milk           | 1:1000           |
| <i>AKT2</i>                      | CST (3063)                            | 5% Non-fat milk           | 1:1000           |
| <i>AKT3</i>                      | CST (3788)                            | 5% Non-fat milk           | 1:1000           |
| <i>T308-AKT</i>                  | CST (4056)                            | 5% BSA                    | 1:1000           |
| <i>S473-Akt</i>                  | CST (4058)                            | 5% BSA                    | 1:1000           |
| <i>S9-GSK3<math>\beta</math></i> | CST (9323)                            | 5% BSA                    | 1:1000           |
| <i>GSK3<math>\beta</math></i>    | CST (9315)                            | 5% Non-fat milk           | 1:1000           |
| <i>T246-PRAS40</i>               | CST (2997)                            | 5% BSA                    | 1:1000           |
| <i>PRAS40</i>                    | CST (2691)                            | 5% Non-fat milk           | 1:1000           |
| <i>T1462-TSC2</i>                | CST (3617)                            | 5% BSA                    | 1:1000           |
| <i>T642-AS160</i>                | CST (4288)                            | 5% BSA                    | 1:1000           |
| <i>AS160</i>                     | MILLIPORE (07-741)                    | 5% Non-fat milk           | 1:1000           |
| <i>T389-S6K1</i>                 | CST (9234)                            | 5% BSA                    | 1:1000           |
| <i>S6K1</i>                      | Santa Cruz (sc-9027)                  | 5% Non-fat milk           | 1:1000           |
| <i>T37/46-4EBP1</i>              | CST (9459)                            | 5% BSA                    | 1:5000           |
| <i>4EBP1</i>                     | CST (9644)                            | 5% Non-fat milk           | 1:5000           |
| <i>CHREBP</i>                    | Novus Biologicals (NB400-135, Lot M5) | 1% Non-fat milk/0.05% BSA | 1:2000           |
| <i>Perilipin</i>                 | CST (9349)                            | 5% Non-fat milk           | 1:1000           |
| <i>PPAR<math>\gamma</math></i>   | Santa Cruz (sc-7196)                  | 5% Non-fat milk           | 1:1000           |
| <i>Mouse IgG</i>                 | CST (7076)                            | 5% Non-fat milk           | 1:5000 – 1:20000 |
| <i>Rabbit IgG</i>                | CST (7074)                            | 5% Non-fat milk           | 1:5000 – 1:20000 |
| <b>Flow Cytometry</b>            |                                       |                           |                  |
| <i>CD31-PE-Cy7</i>               | eBioscience (25-0311)                 | 2% FBS HBSS               | 1:1000           |
| <i>CD45-PE-Cy7</i>               | eBioscience (25-00451)                | 2% FBS HBSS               | 1:1000           |
| <i>CD29-A700</i>                 | Biolegend (102218)                    | 2% FBS HBSS               | 1:400            |
| <i>CD34-A647</i>                 | Biolegend (119314)                    | 2% FBS HBSS               | 1:200            |
| <i>Sca1-PacBlue</i>              | BD Bioscience (560653)                | 2% FBS HBSS               | 1:1000           |
